# Supplementary material for: Lysosome Alterations in the Human Epithelial Cell Line HaCaT and Skin Specimens: Relevance to Psoriasis
Source: MDPI journal article supplement (doi:10.3390/ijms20092255), 2019-05-07

## **Supplementary material:**

# **Lysosome alterations in the human epithelial cell line HaCaT and skin specimens: relevance to psoriasis**

Katarzyna Bocheńska<sup>a</sup>, Marta Moskot<sup>a,b</sup>, Marcelina Malinowska<sup>a</sup>, Joanna Jakóbkiewicz-Banecka<sup>a</sup>, Aneta Szczerkowska-Dobosz<sup>c</sup>, Dorota Purzycka-Bohdan<sup>c</sup>, Joanna Pleńkowska<sup>a</sup>, Bartosz Słomiński<sup>d</sup>, Magdalena Gabig-Cimińska<sup>a,b\*</sup>

<sup>a</sup>*Department of Medical Biology and Genetics, University of Gdańsk, Wita Stwosza 59, 80-308 Gdańsk, Poland*

<sup>b</sup>*Institute of Biochemistry and Biophysics, Polish Academy of Sciences, Laboratory of Molecular Biology, Kładki 24, 80-822 Gdańsk, Poland*

<sup>c</sup>*Department of Dermatology, Venereology and Allergology, Medical University of Gdańsk, Mariana Smoluchowskiego 17, 80-214, Gdańsk, Poland*

<sup>d</sup>*Department of Molecular and Cellular Biology, Intercollegiate Faculty of Biotechnology UG-MUG, Abrahama 58, 80-307 Gdańsk, Poland*

\*Corresponding author:

Tel. +48 58 523 6046, fax: +48 58 523 6025; E-mail: [m.gabig@biol.ug.edu.pl](mailto:m.gabig@biol.ug.edu.pl)

Table S1. Real-time qRT-PCR verification result of the microphthalmia family (MiT family) genes (*MITF*, *TFE3*, *TFEB* and *TFEC*), lysosomal marker genes and those encoding factors that control the lysosomal biogenesis process (*LAMP1*, *MCOLN1*, *MTORC1*, *PPP3CA* and *PPP3CB*), and genes encoding lysosomal enzymes (*ASAH*, *GLA*, *GM2A*, *HPSE*, *HYAL4*, *PSAP*, *SMPD1* and *SPHK1*) in skin specimens. The relative mRNA expression levels were determined against *GAPDH* (glyceraldehyde-3-phosphate dehydrogenase) mRNA level, and were calculated with  $2^{-\Delta\Delta C_t}$  relative quantification and comparing between each group: (A) comparison between PP vs. NN, (B) PN vs. NN, and (C) comparison between PP vs. PN. Blue series – gene down-regulated (fold change,  $FC \leq 0.7$ ); gray series – gene non-regulated ( $1.3 > FC > 0.7$ ); red series – gene up-regulated ( $FC \geq 1.3$ ). PP – psoriatic plaque, PN – psoriatic normal, NN – non-psoriatic normal, with n = 11 (psoriasis patients with numbers from 8 to 18) for PP/PN, and n = 11 (healthy individuals as a control with numbers from 5 to 15) for NN. Each experiment of real-time qRT-PCR analysis was repeated at least three times (technical repetition).

**A**

| PATIENT NO. | <i>MITF</i> | <i>TFE3</i> | <i>TFEB</i> | <i>TFEC</i> | <i>LAMP1</i> | <i>MCOLN1</i> | <i>MTORC1</i> | <i>PPP3CA</i> | <i>PPP3CB</i> | <i>ASAH</i> | <i>GLA</i> | <i>GM2A</i> | <i>HPSE</i> | <i>HYAL4</i> | <i>PSAP</i> | <i>SMPD1</i> | <i>SPHK1</i> |
|-------------|-------------|-------------|-------------|-------------|--------------|---------------|---------------|---------------|---------------|-------------|------------|-------------|-------------|--------------|-------------|--------------|--------------|
| 8           | 0.15        | 0.00        | 0.11        | 0.02        | 0.34         | 0.34          | 0.23          | 0.01          | 0.02          | 0.00        | 0.04       | 1.51        | 1.46        | 0.66         | 0.03        | 0.00         | 0.03         |
| 9           | 0.12        | 0.02        | 0.04        | 0.00        | 0.57         | 0.27          | 0.22          | 0.03          | 0.01          | 0.00        | 0.16       | 3.26        | 3.88        | 2.83         | 0.04        | 0.00         | 0.04         |
| 10          | 1.37        | 0.16        | 0.19        | 0.01        | 2.40         | 4.38          | 4.88          | 0.09          | 0.06          | 0.06        | 9.62       | 332.12      | 5.77        | 6.38         | 0.87        | 0.02         | 0.73         |
| 11          | 0.27        | 0.04        | 0.05        | 0.04        | 4.33         | 6.03          | 46.06         | 0.12          | 0.06          | 0.15        | 25.03      | 88.37       | 112.81      | 0.02         | 1.27        | 0.18         | 2.49         |
| 12          | 0.73        | 0.11        | 0.18        | 0.03        | 9.03         | 13.76         | 7.29          | 0.13          | 0.10          | 0.33        | 25.73      | 18.97       | 91.00       | 99.27        | 2.75        | 0.13         | 3.69         |
| 13          | 0.19        | 0.01        | 0.03        | 0.01        | 3.02         | 8.83          | 19.37         | 0.31          | 0.03          | 0.15        | 16.06      | 20.19       | 106.73      | 251.31       | 0.67        | 0.07         | 47.67        |
| 14          | 0.07        | 0.01        | 0.04        | 0.04        | 1.43         | 2.30          | 1.22          | 0.80          | 0.03          | 0.12        | 5.12       | 2.61        | 29.61       | 67.81        | 1.39        | 0.01         | 19.09        |
| 15          | 0.14        | 0.01        | 0.04        | 0.01        | 2.32         | 4.97          | 2.65          | 0.25          | 0.04          | 0.09        | 11.52      | 36.90       | 69.44       | 163.52       | 1.09        | 0.06         | 1.41         |
| 16          | 0.12        | 0.04        | 0.03        | 0.01        | 8.25         | 18.15         | 10.82         | 0.09          | 0.05          | 0.14        | 18.45      | 158.19      | 81.45       | 138.46       | 1.20        | 0.20         | 2.12         |
| 17          | 0.07        | 0.03        | 0.04        | 0.02        | 2.47         | 3.54          | 4.19          | 0.07          | 0.03          | 0.05        | 9.42       | 83.03       | 55.63       | 0.01         | 0.94        | 0.11         | 1.27         |
| 18          | 0.10        | 0.13        | 0.05        | 0.01        | 7.70         | 22.82         | 29.77         | 0.06          | 0.05          | 0.34        | 38.47      | 9.48        | 103.09      | 0.10         | 2.77        | 0.00         | 4.68         |

B

| PATIENT NO. | MITF | TFE3 | TFEB | TFEC | LAMP1  | MCOLN1 | MTORC1 | PPP3CA | PPP3CB | ASAH  | GLA   | GM2A   | HPSE  | HYAL4 | PSAP | SMPD1  | SPHK1 |
|-------------|------|------|------|------|--------|--------|--------|--------|--------|-------|-------|--------|-------|-------|------|--------|-------|
| 8           | 0.14 | 0.02 | 0.01 | 0.00 | 0.68   | 0.64   | 0.36   | 0.02   | 0.02   | 0.19  | 0.07  | 2.32   | 1.08  | 0.72  | 0.04 | 0.75   | 0.05  |
| 9           | 0.23 | 0.13 | 0.12 | 0.00 | 0.72   | 0.64   | 1.91   | 0.04   | 0.02   | 0.35  | 0.25  | 2.14   | 2.56  | 0.90  | 0.11 | 2.68   | 0.15  |
| 10          | 2.18 | 1.05 | 0.33 | 0.03 | 5.48   | 22.50  | 18.32  | 0.01   | 0.20   | 33.50 | 50.41 | 63.68  | 43.95 | 0.05  | 1.28 | 88.19  | 2.69  |
| 11          | 0.26 | 0.08 | 0.10 | 0.05 | 5.41   | 3.25   | 40.38  | 0.10   | 0.06   | 12.61 | 27.20 | 258.78 | 62.15 | 0.00  | 1.61 | 75.19  | 2.40  |
| 12          | 0.28 | 0.28 | 0.24 | 0.01 | 6.43   | 15.26  | 57.90  | 0.07   | 0.07   | 7.98  | 18.32 | 376.25 | 17.60 | 0.65  | 0.88 | 53.91  | 2.15  |
| 13          | 0.68 | 0.20 | 0.15 | 0.02 | 3.35   | 8.12   | 5.41   | 0.12   | 0.11   | 7.34  | 12.09 | 8.85   | 49.79 | 48.95 | 2.87 | 23.47  | 1.56  |
| 14          | 0.19 | 0.09 | 0.15 | 0.03 | 2.11   | 4.03   | 2.32   | 0.08   | 0.07   | 4.25  | 6.71  | 159.29 | 20.36 | 0.01  | 1.17 | 6.83   | 1.07  |
| 15          | 0.50 | 0.01 | 0.02 | 0.00 | 144.51 | 74.65  | 2.59   | 0.06   | 0.03   | 11.44 | 10.67 | 42.09  | 20.93 | 0.01  | 1.93 | 17.54  | 1.40  |
| 16          | 0.57 | 0.22 | 0.17 | 0.01 | 5.56   | 12.66  | 6.57   | 0.13   | 0.16   | 8.15  | 10.17 | 52.18  | 26.50 | 0.00  | 1.11 | 49.95  | 2.82  |
| 17          | 0.17 | 0.08 | 0.08 | 0.02 | 3.26   | 4.90   | 5.52   | 0.06   | 0.05   | 4.22  | 8.03  | 19.50  | 42.75 | 0.00  | 1.32 | 36.06  | 1.30  |
| 18          | 0.60 | 0.17 | 0.18 | 0.01 | 7.29   | 10.28  | 70.79  | 0.10   | 0.15   | 23.85 | 39.55 | 30.48  | 43.05 | 0.02  | 2.07 | 129.11 | 4.52  |

C

| PATIENT NO. | MITF | TFE3 | TFEB | TFEC | LAMP1 | MCOLN1 | MTORC1 | PPP3CA | PPP3CB | ASAH | GLA  | GM2A | HPSE | HYAL4    | PSAP | SMPD1 | SPHK1 |
|-------------|------|------|------|------|-------|--------|--------|--------|--------|------|------|------|------|----------|------|-------|-------|
| 8           | 1.04 | 0.07 | 0.25 | 0.68 | 0.50  | 0.53   | 0.24   | 0.40   | 0.71   | 0.42 | 0.60 | 0.65 | 1.36 | 0.91     | 0.57 | 0.90  | 0.58  |
| 9           | 0.53 | 0.13 | 0.34 | 1.43 | 0.80  | 0.42   | 0.11   | 0.84   | 0.33   | 0.45 | 0.62 | 1.53 | 1.52 | 3.14     | 0.41 | 0.36  | 0.26  |
| 10          | 0.63 | 0.15 | 0.56 | 0.27 | 0.44  | 0.19   | 0.75   | 8.63   | 0.30   | 0.11 | 0.19 | 0.12 | 0.13 | 0.00     | 0.68 | 0.10  | 0.27  |
| 11          | 1.04 | 0.55 | 0.49 | 1.13 | 0.80  | 1.85   | 1.14   | 1.20   | 0.95   | 0.69 | 0.92 | 0.03 | 1.82 | 7.06     | 0.78 | 0.87  | 1.04  |
| 12          | 0.14 | 1.51 | 1.21 | 0.72 | 4.17  | 2.27   | 0.25   | 0.89   | 0.82   | 2.07 | 0.48 | 0.01 | 1.27 | 4904.87  | 2.77 | 1.73  | 0.06  |
| 13          | 0.75 | 0.04 | 0.00 | 0.55 | 0.90  | 1.09   | 3.58   | 2.72   | 0.29   | 1.16 | 1.33 | 2.28 | 2.14 | 5.13     | 0.50 | 1.10  | 30.48 |
| 14          | 0.40 | 0.07 | 0.00 | 1.48 | 0.68  | 0.57   | 0.52   | 10.23  | 0.47   | 1.61 | 0.76 | 0.02 | 1.45 | 11993.79 | 1.19 | 0.74  | 17.88 |
| 15          | 0.27 | 1.02 | 1.91 | 2.69 | 0.02  | 0.07   | 1.02   | 4.07   | 1.39   | 0.48 | 1.08 | 0.88 | 3.32 | 3007.12  | 0.56 | 1.14  | 1.01  |
| 16          | 0.21 | 0.16 | 0.17 | 0.95 | 1.48  | 1.43   | 1.65   | 0.73   | 0.30   | 1.04 | 1.82 | 3.03 | 3.07 | 6553.01  | 1.08 | 1.43  | 0.75  |
| 17          | 0.38 | 0.31 | 0.44 | 1.07 | 0.76  | 0.72   | 0.76   | 1.11   | 0.66   | 0.62 | 1.17 | 4.26 | 1.30 | 21.56    | 0.71 | 1.11  | 0.98  |
| 18          | 0.16 | 0.33 | 0.26 | 0.86 | 1.06  | 2.22   | 0.42   | 0.57   | 0.34   | 0.83 | 0.97 | 0.00 | 2.39 | 7865.31  | 1.34 | 1.01  | 1.04  |

Figure S1. Percentage distribution of the expression of the microphthalmia family (MiT family) genes (*MITF*, *TFE3*, *TFEB* and *TFEC*), lysosomal marker genes and those encoding factors that control the lysosomal biogenesis process (*LAMP1*, *MCOLN1*, *MTORC1*, *PPP3CA* and *PPP3CB*), and genes encoding lysosomal enzymes (*ASAH*, *GLA*, *GM2A*, *HPSE*, *HYAL4*, *PSAP*, *SMPD1* and *SPHK1*) in skin specimens. Comparisons between PP vs. NN (right column), PN vs. NN (middle column), PP vs. PN groups (left column). Blue series – gene down-regulated (fold change,  $FC \leq 0.7$ ); gray series – gene non-regulated ( $1.3 > FC > 0.7$ ); red series – gene up-regulated ( $FC \geq 1.3$ ). PP – psoriatic plaque, PN – psoriatic normal, NN – non-psoriatic normal, with  $n = 11$  (psoriasis patients with numbers from 8 to 18) for PP/PN, and  $n = 11$  (healthy individuals as a control with numbers from 5 to 15) for NN. Each experiment of real-time qRT-PCR analysis was repeated at least three times (technical repetition).

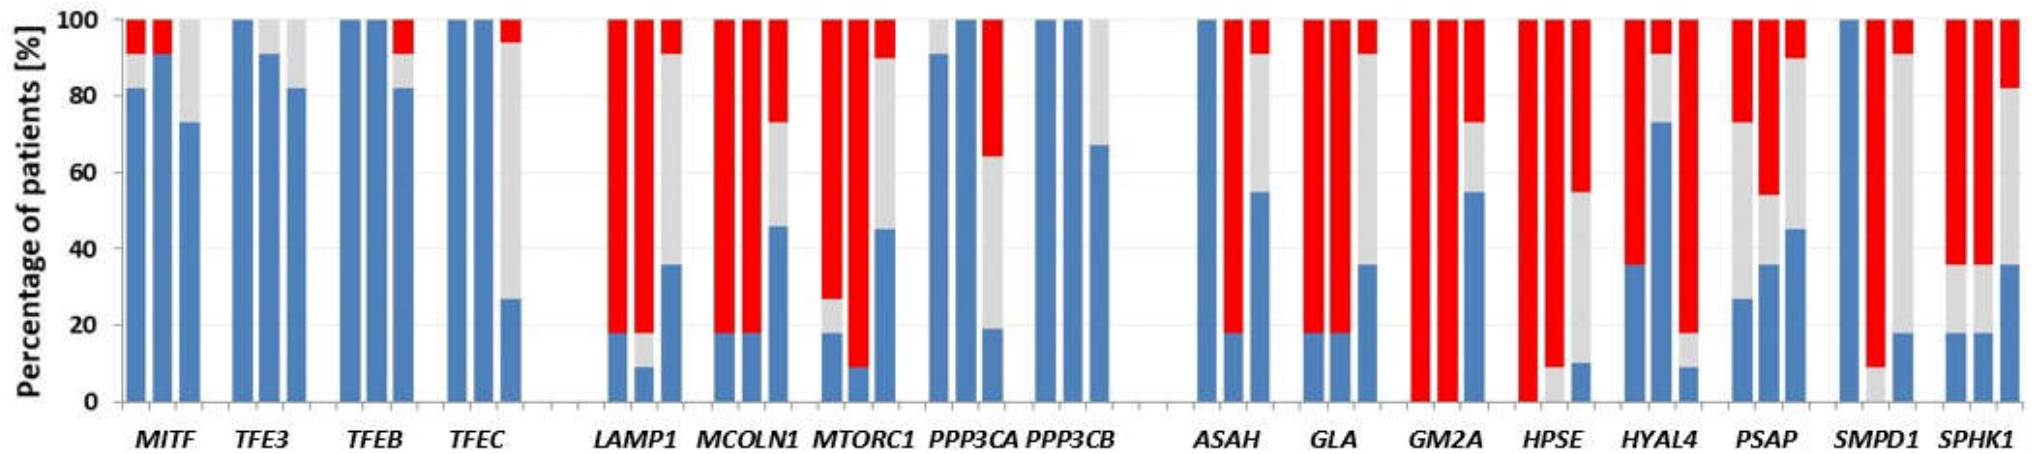

Supplement: s1 [file s1]
